# Supplementary material for: Circ_0099630 knockdown alleviates lipopolysaccharide-induced injuries of human periodontal ligament cells through the inhibition of TLR4 by releasing miR-409-3p
Source: Springer Nature journal article supplement (doi:10.1186/s12903-023-03622-7), 2023-11-25

Fig 1F

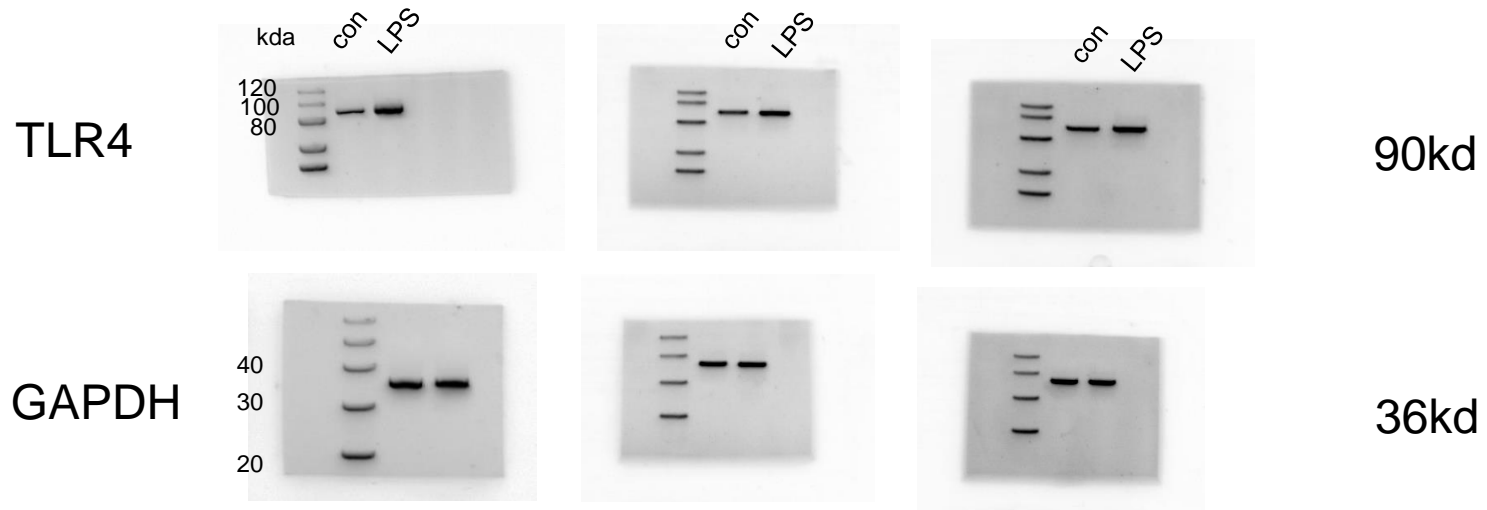

Fig 2F

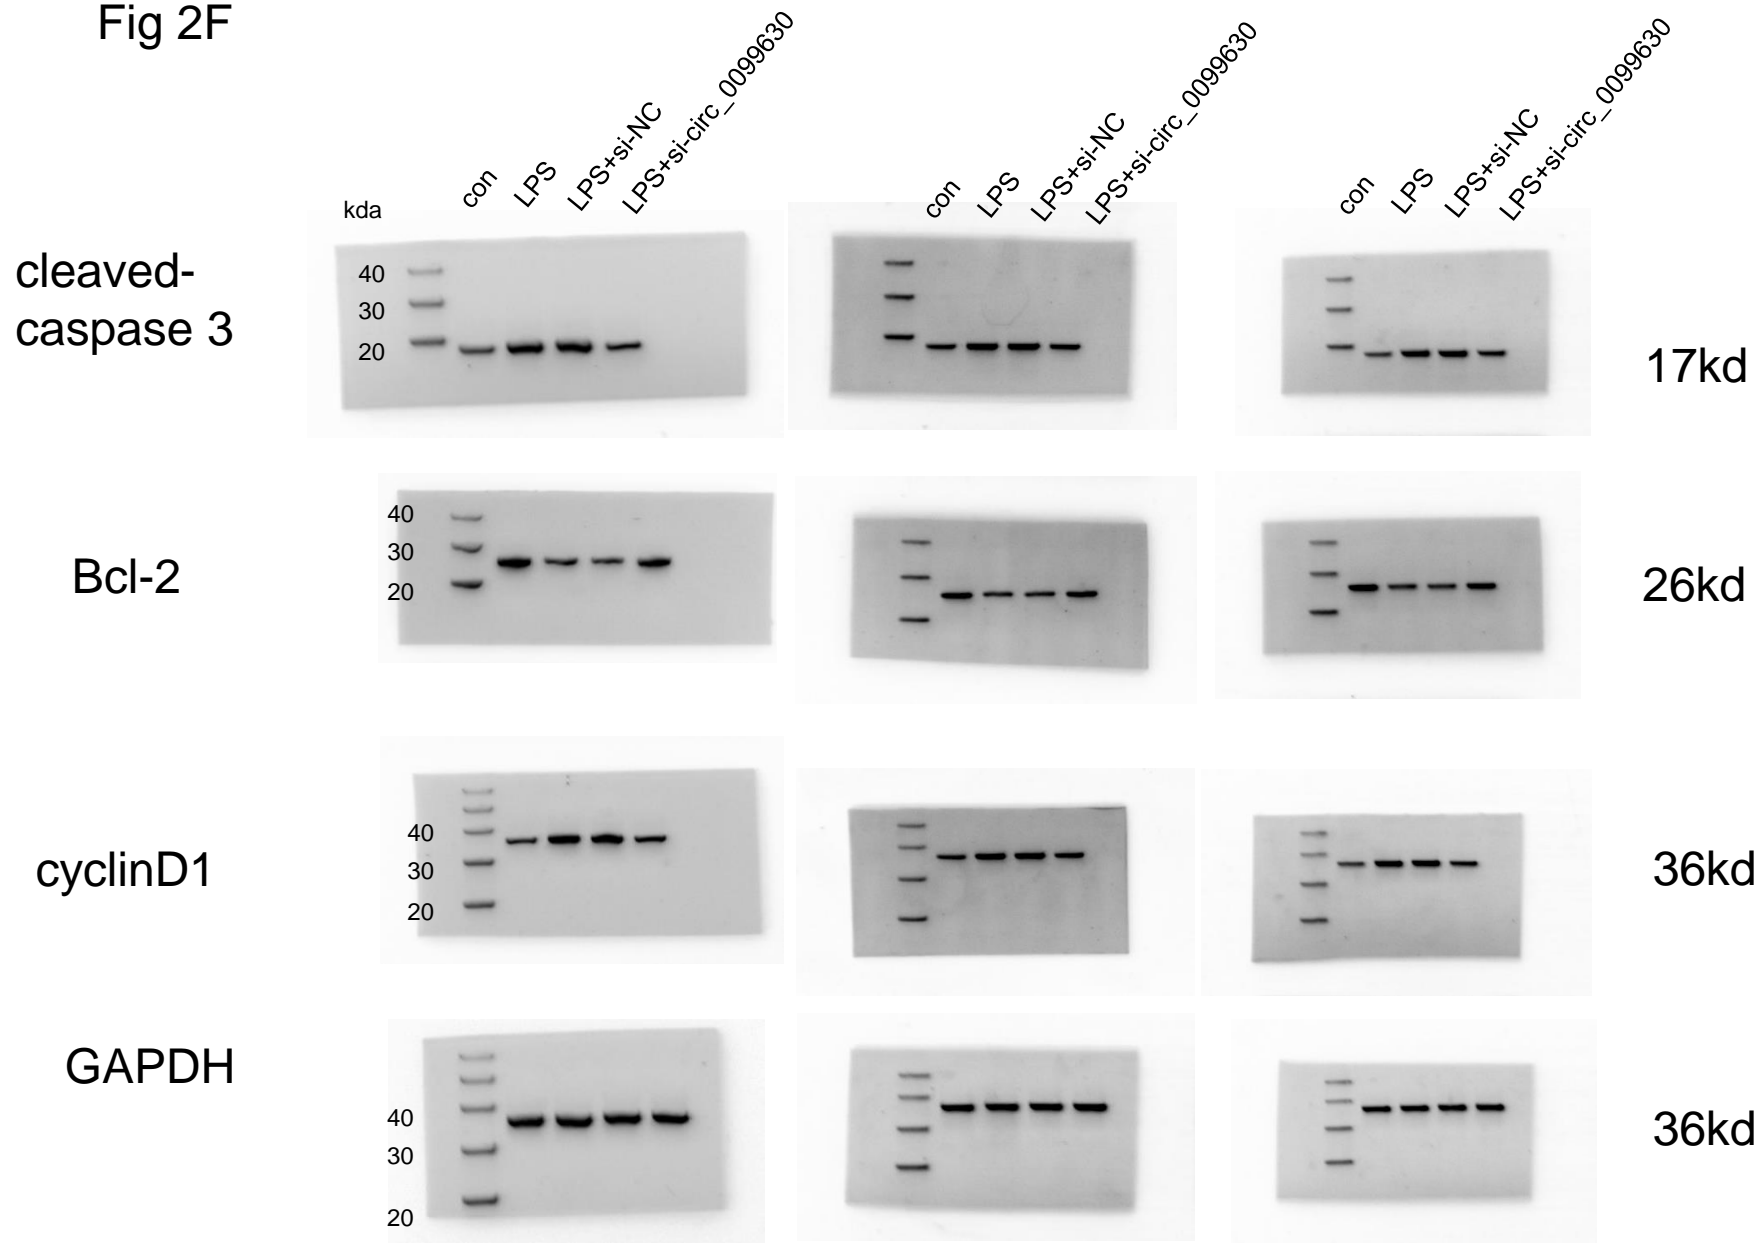

Fig 3A

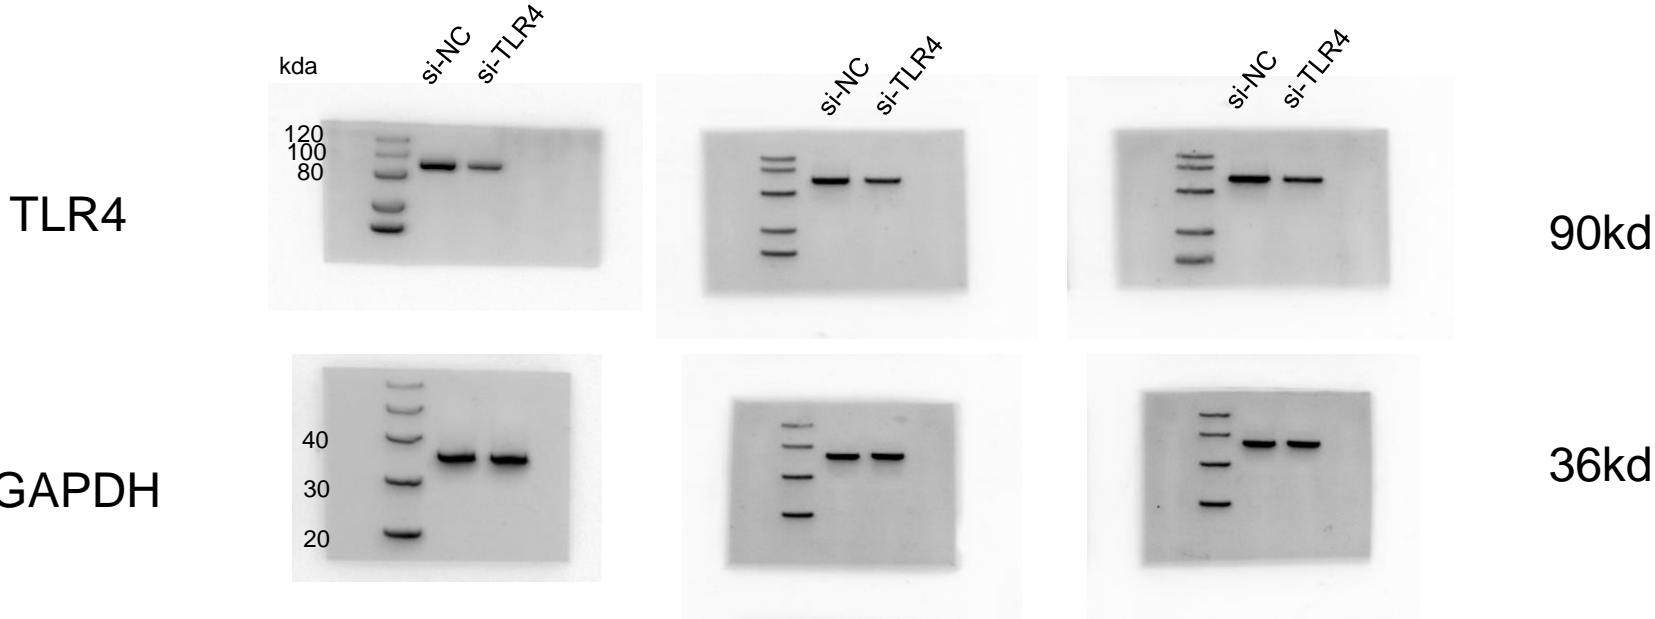

Fig 3F

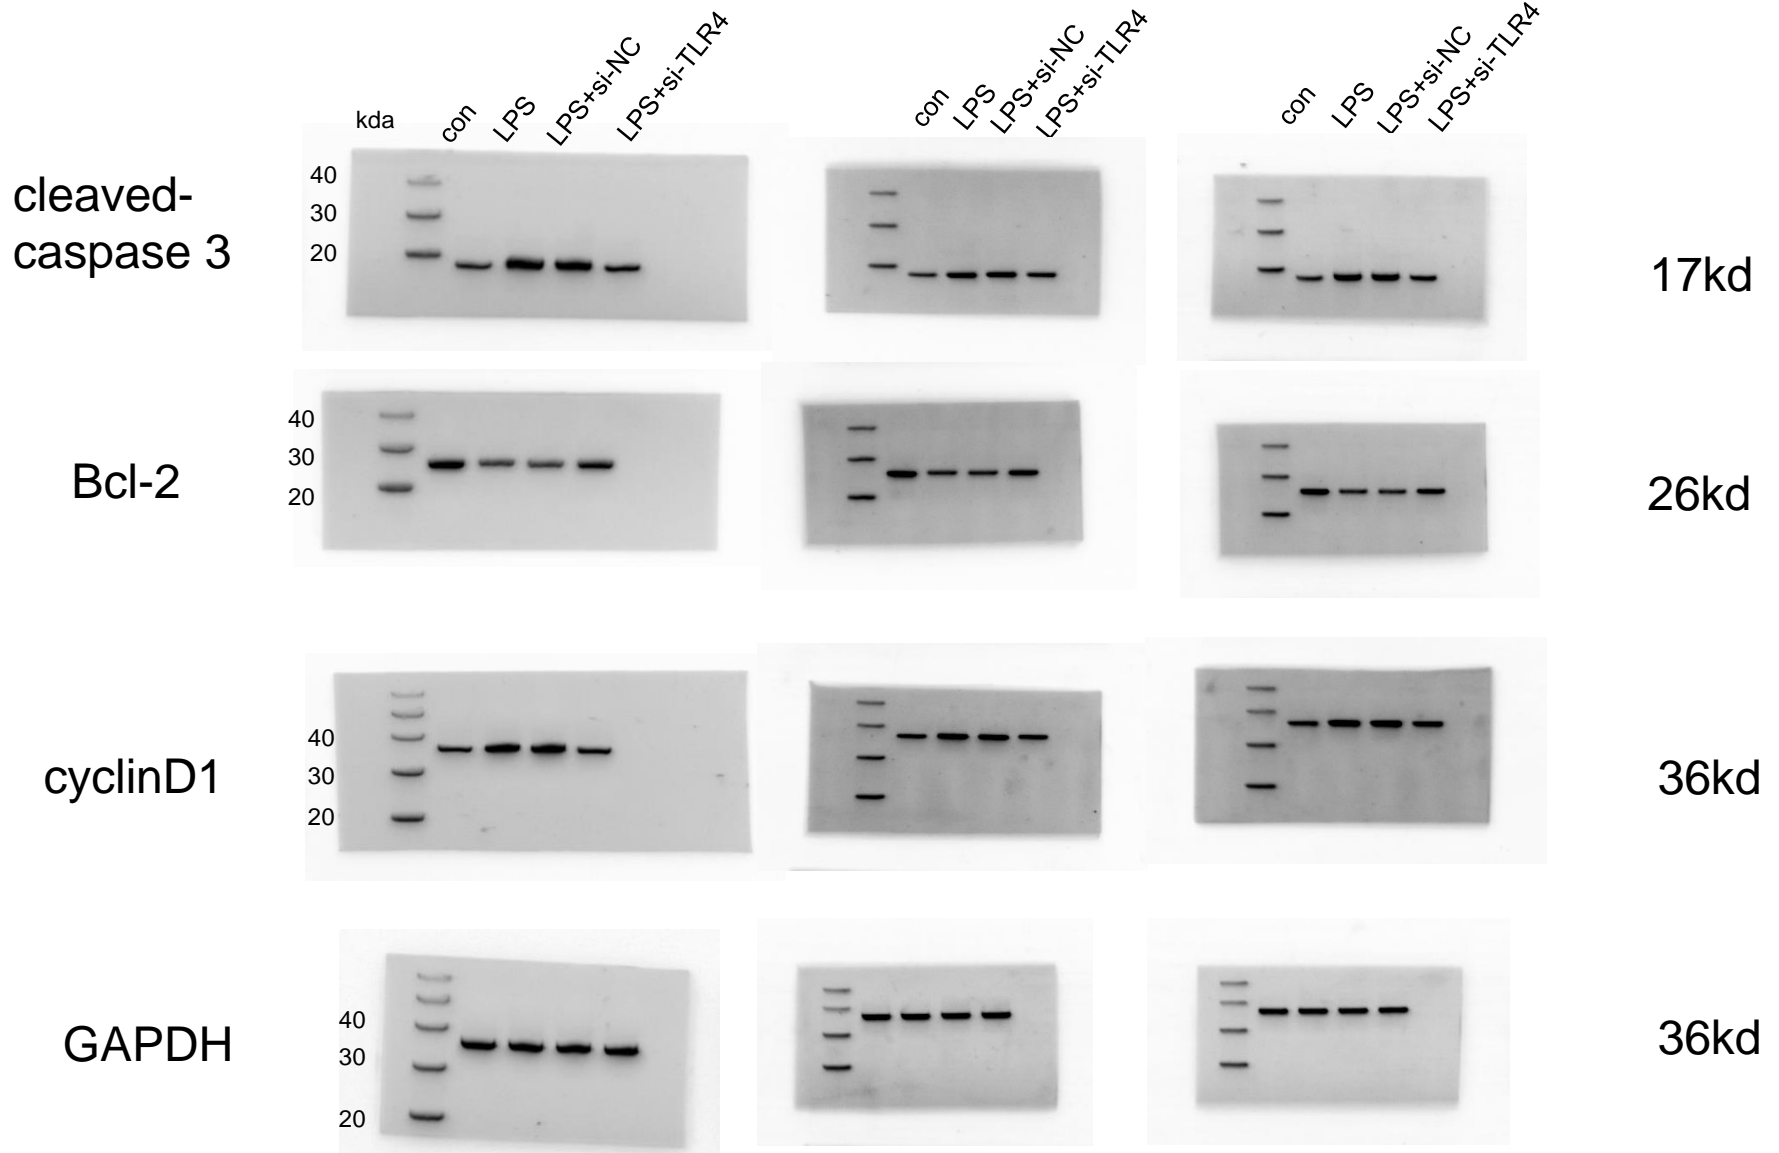

Fig 4A

1: LPS+si-NC      2: LPS+si-circ\_0099630      3: LPS+si-circ\_0099630+vector  
4: LPS+si-circ\_0099630+TLR4

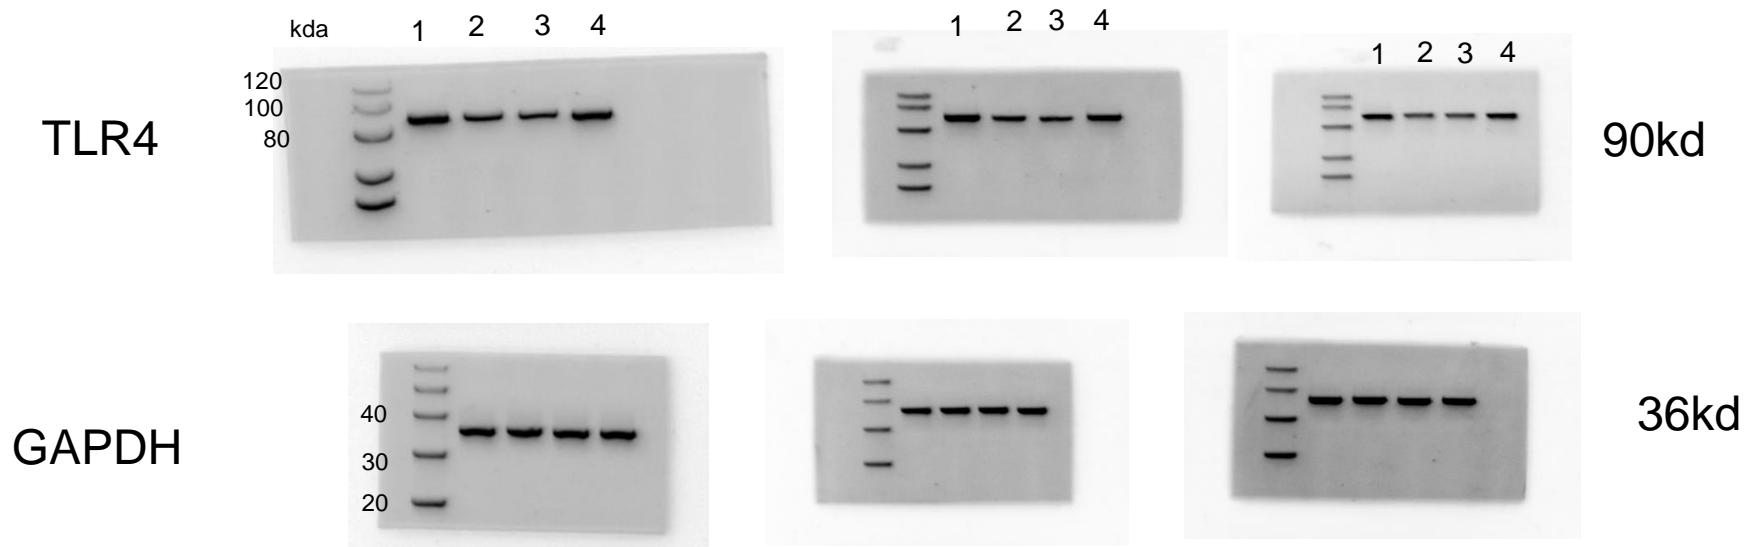

Fig 4F

1: LPS+si-NC      2: LPS+si-circ\_0099630      3: LPS+si-circ\_0099630+vector  
4: LPS+si-circ\_0099630+TLR4

cleaved-caspase 3

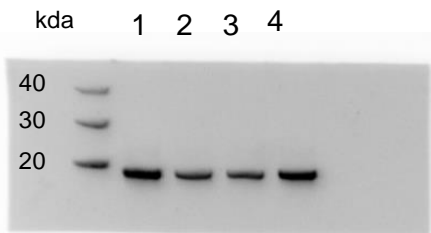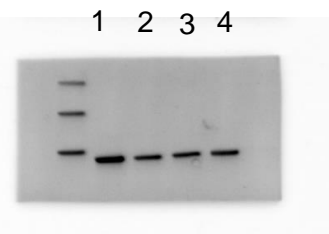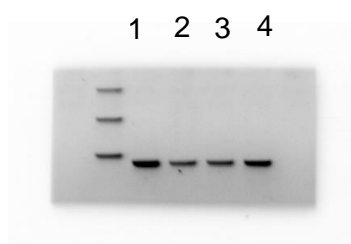

17kd

Bcl-2

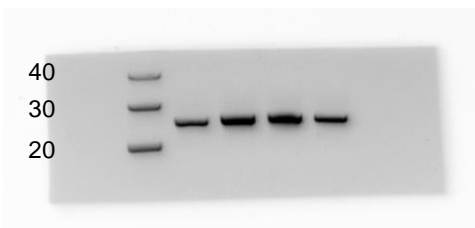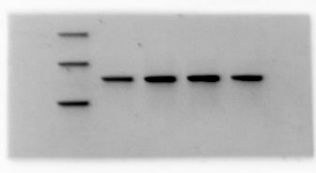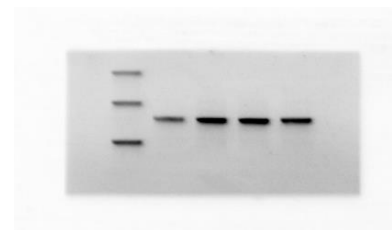

26kd

cyclinD1

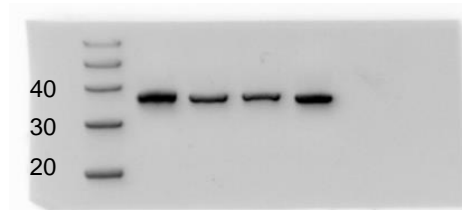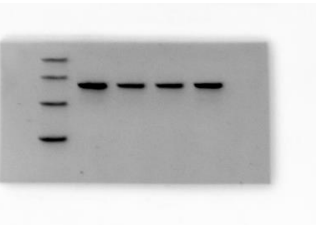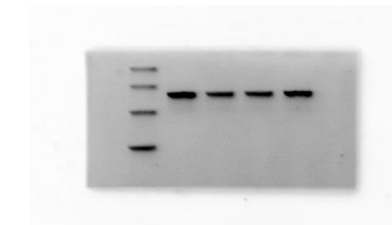

36kd

GAPDH

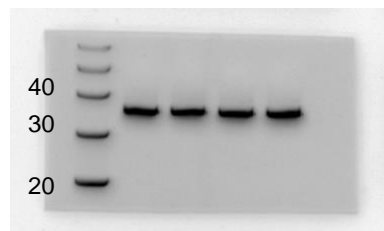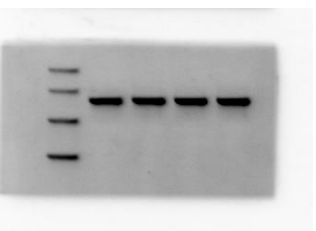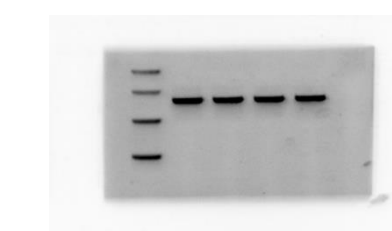

36kd

Fig 5L

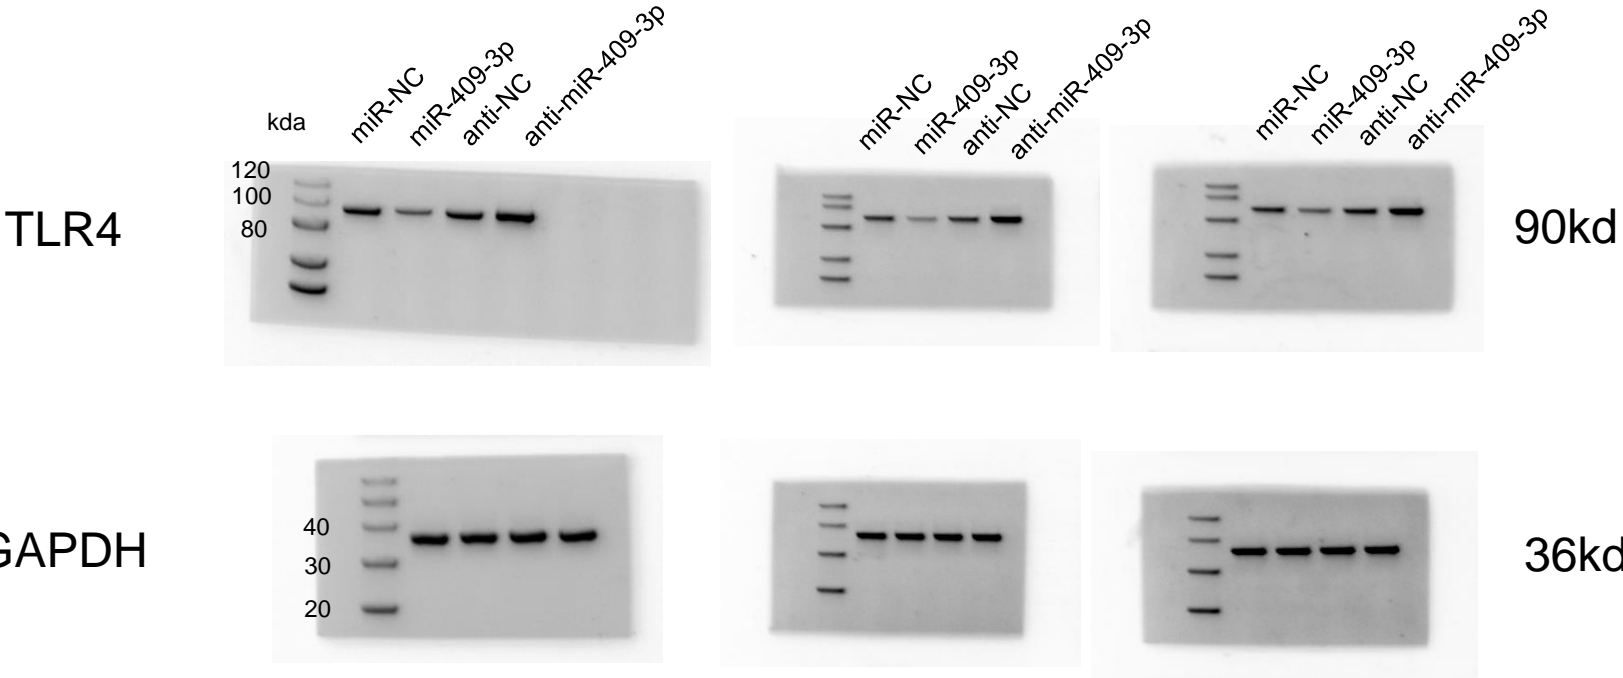

Fig 6F

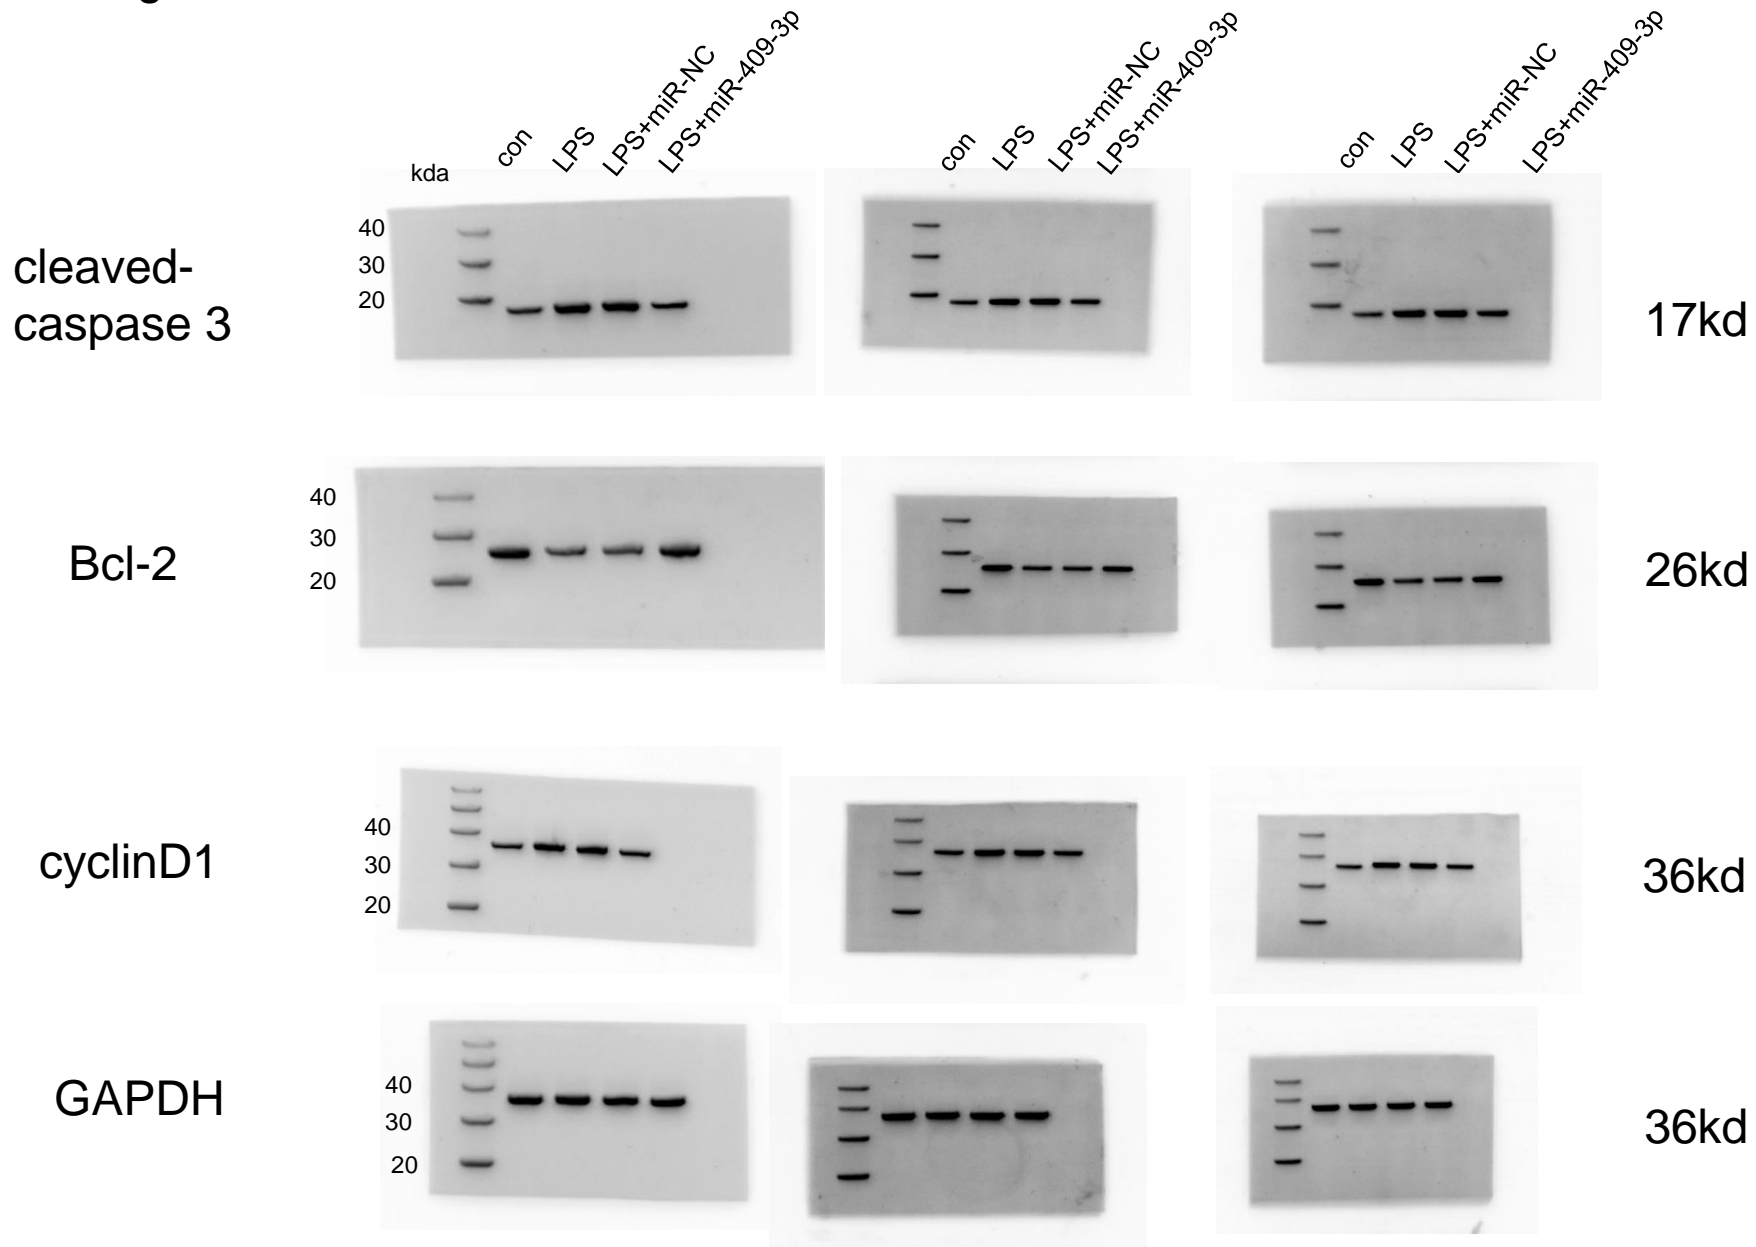



Fig 7A

1: LPS+miR-NC

2: LPS+miR-409-3p

3: LPS+miR-409-3p+vector

4: LPS+miR-409-3p+TLR4

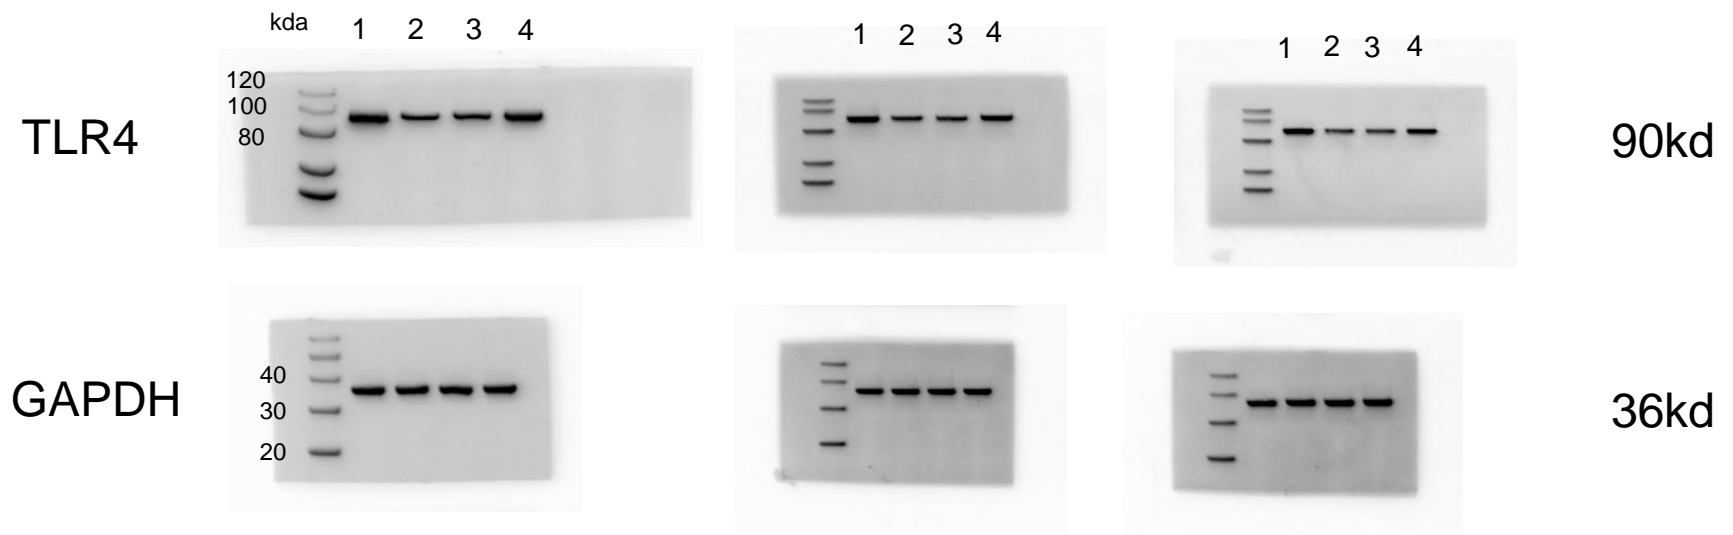

Fig 7F

1: LPS+miR-NC      2: LPS+miR-409-3p      3: LPS+miR-409-3p+vector  
4: LPS+miR-409-3p+TLR4

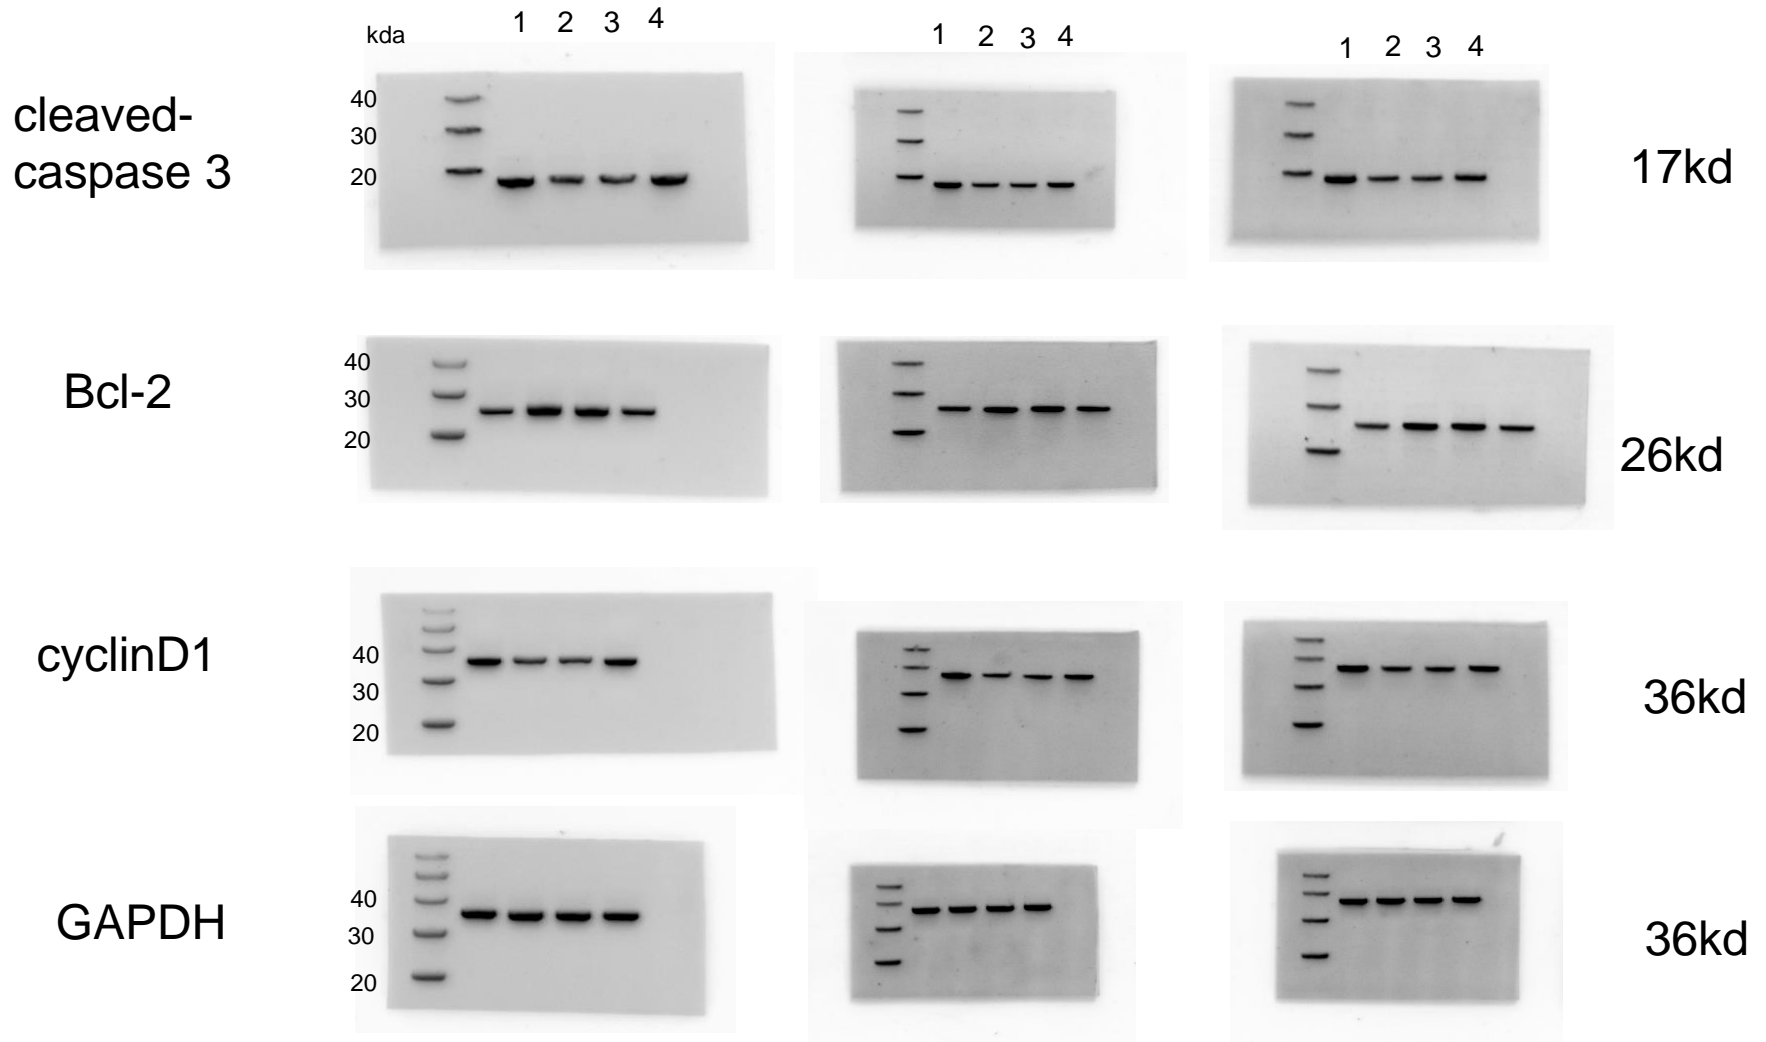

1: con    2: LPS    3: LPS+si-NC    4: LPS+si-circ\_0099630

5: LPS+si-circ\_0099630+vector

6: LPS+si-circ\_0099630+TLR4

Fig 8A

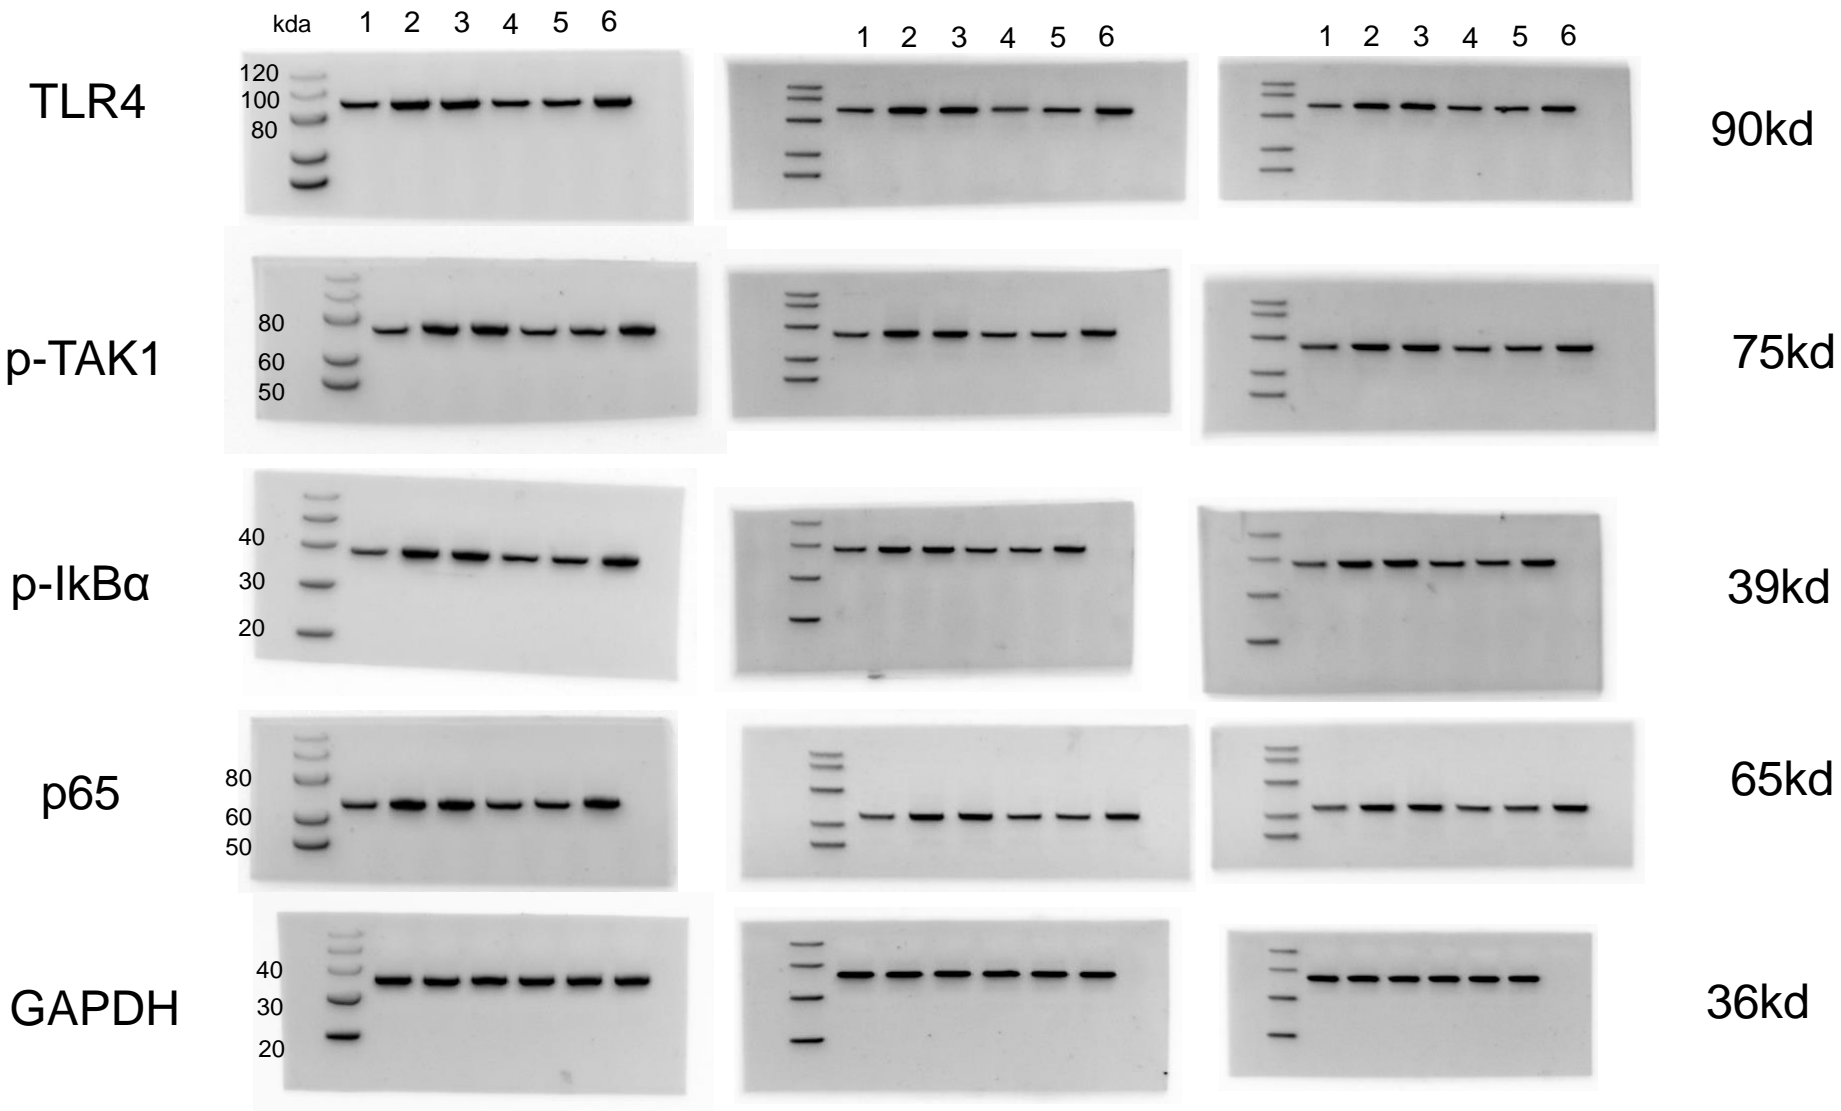

Supplement: MOESM2 [file 26356580]
